# Supplementary material for: Spectroscopic and Thermal Characterization of Sodium 10,12‑pentacosadiynoate (PCDA–Na) Derived from 10,12‑Pentacosadiynoic Acid (PCDA)
Source: Research Square preprint supplement (doi:10.21203/rs.3.rs-8029559/v1), 2025-11-18

# Supporting Information: Spectra and Figures

This document contains placeholders for numbered spectra and associated captions extracted from the manuscript.

Figure 1. FT-IR absorption spectrum of 10,12-pentacosadiynoic acid (PCDA)


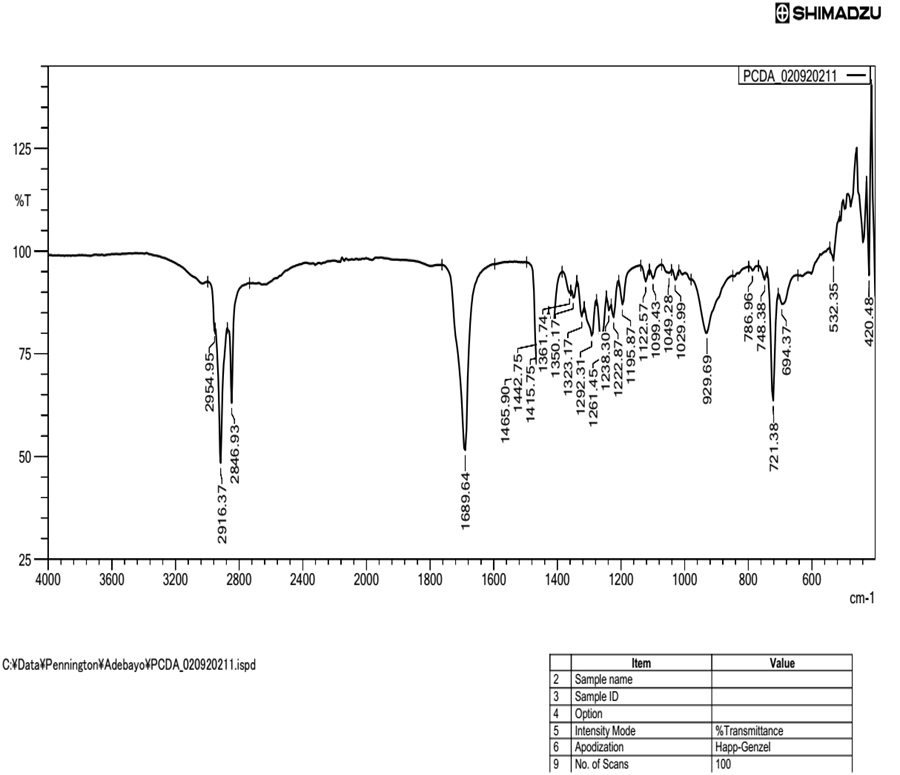


Figure 2. FT-IR absorption spectrum of sodium 10,12-pentacosadiynoate (PCDA-Na)


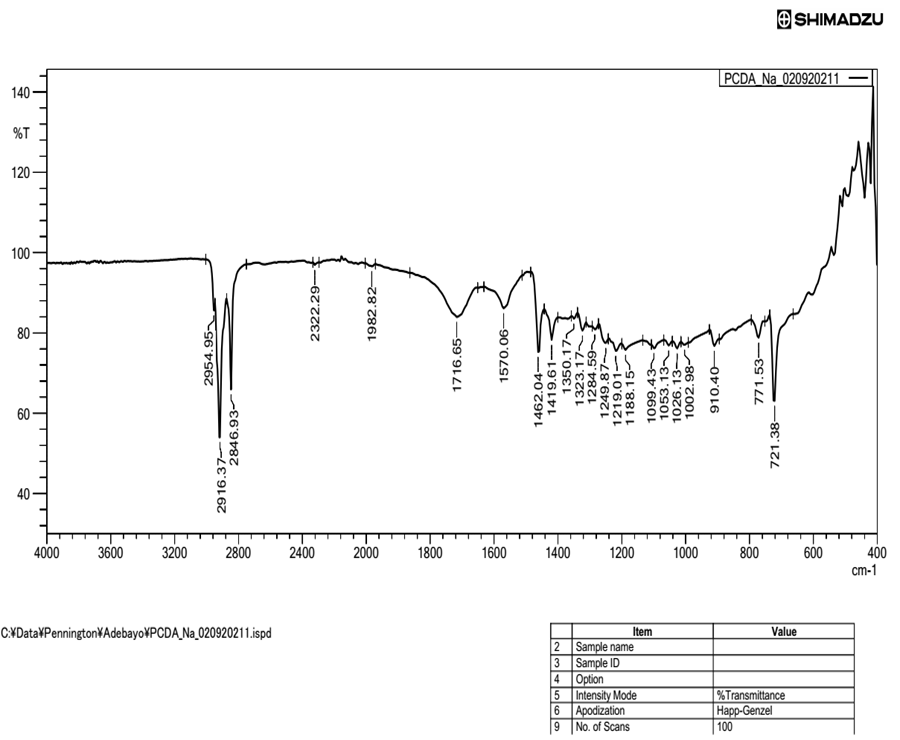


Figure 3. Comparative FT-IR spectra of PCDA and PCDA-Na


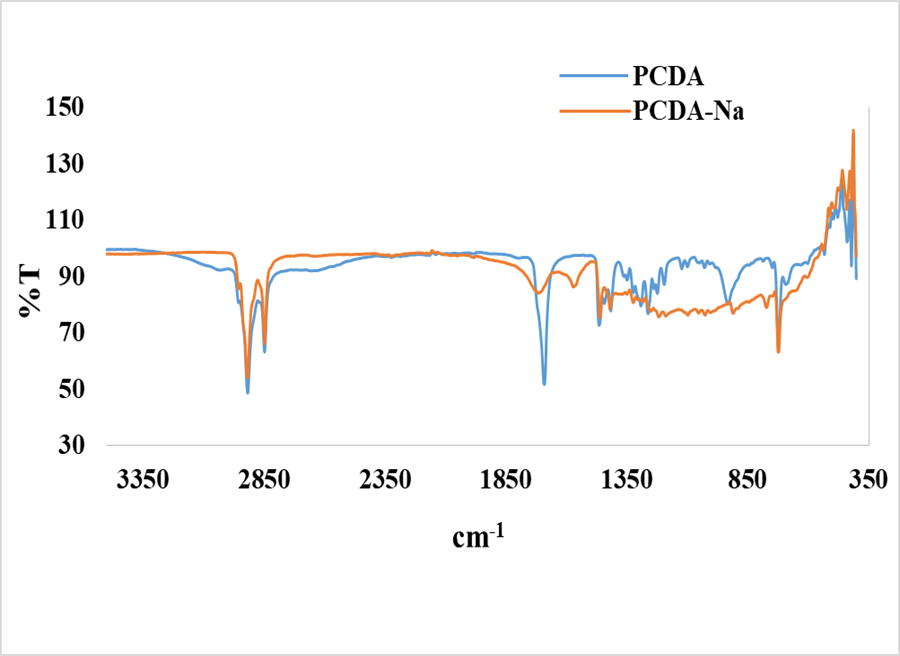


Figure 4. XRD patterns overlay of the PCDA and PCDA-Na


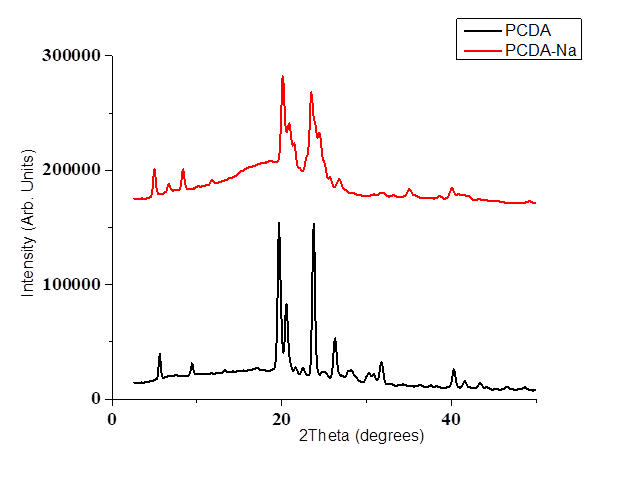


Figure 5. DSC-TGA thermograms for PCDA-Na (Na₂CO₃)


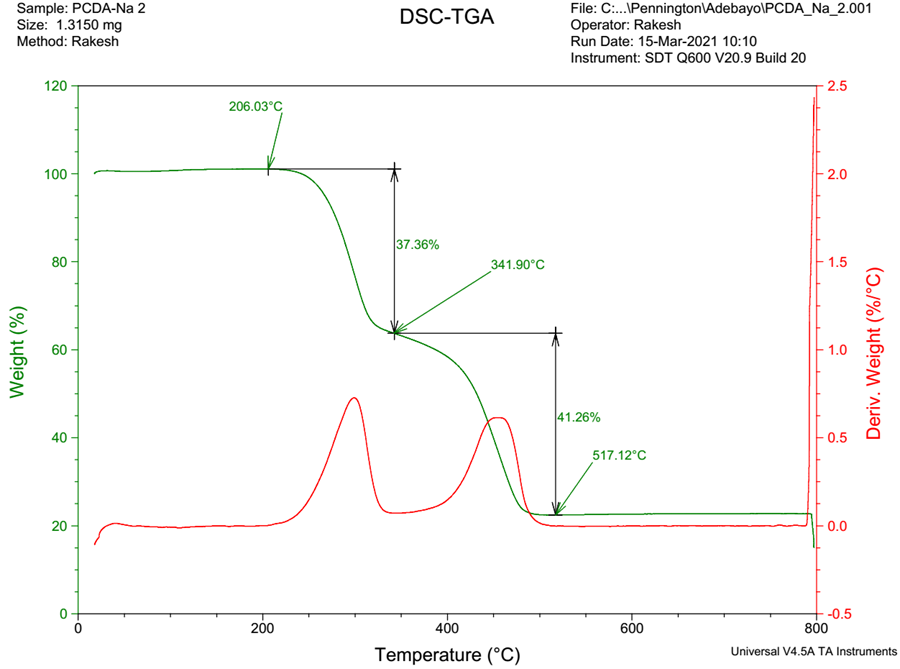


Figure 6. DSC-TGA thermograms for PCDA-Na (NaOH)


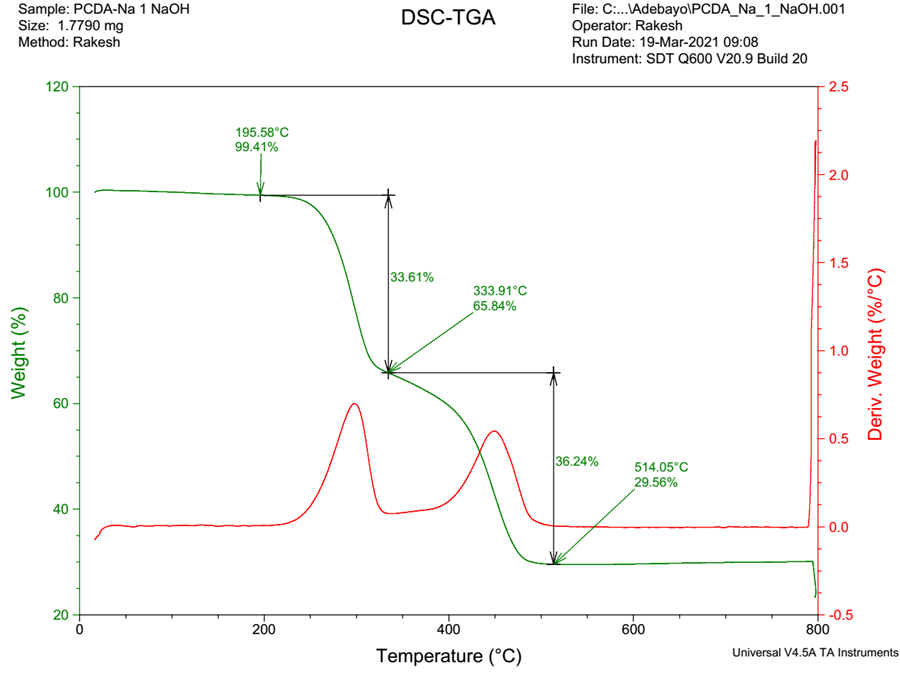

Supplement: Supplementary file 1 [file 4e6d3df976dff380afb8a131.docx]
